# Supplementary material for: A portable electrochemical sensing platform for serotonin detection based on surface-modified carbon fiber microelectrodes
Source: Royal Society of Chemistry journal article supplement (doi:10.1039/d2ay01627c), 2023-01-01
Supplement: d2ay01627c1.pdf [file d2ay01627c1.pdf]

## Supplementary Information

### A Portable Electrochemical Sensing Platform for Serotonin Detection Based on Surface-Modified Carbon Fiber Microelectrode

Jinjing Han,<sup>a-c</sup> Justin M. Stine,<sup>a-c</sup> Ashley A. Chapin<sup>b-d</sup> and Reza Ghodssi<sup>\*a-d</sup>

a. Department of Electrical and Computer Engineering, University of Maryland, College Park, MD 20742, USA.

b. Institute for Systems Research, University of Maryland, College Park, MD 20742, USA.

c. Robert E. Fischell Institute for Biomedical Devices, University of Maryland, College Park, MD 20742, USA.

d. Fischell Department of Bioengineering, University of Maryland, College Park, MD 20742, USA.

\* Corresponding Author. Email: ghodssi@umd.edu (R. Ghodssi)

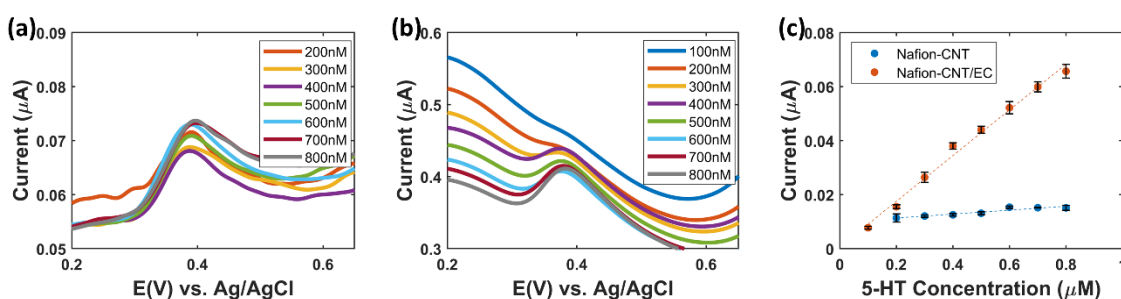

**Fig. S1** 5-HT sensitivity at surface-modified CMFEs. (a) Representative Nafion-CNT CV curves within the linear range (200 nM – 800 nM). (b) Representative Nafion-CNT/EC CV curves within the linear range (100 nM – 800 nM). (c) Calibration curves of 5-HT for Nafion-CNT (200 nM – 800 nM) and Nafion-CNT/EC (100 nM – 800 nM). Error bars denote standard error (n=3).

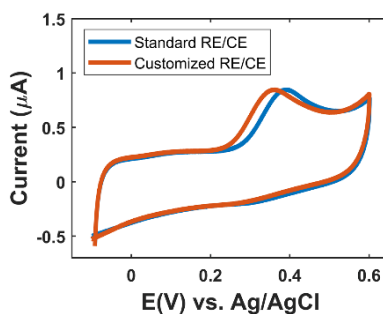

**Fig. S2** Cyclic voltammogram comparing standard and customized CE/RE in 10 μM 5-HT. Potential range: -0.1 to 0.6 V. Scan rate: 200 mV/s. Nafion-CNT/EC as WE.

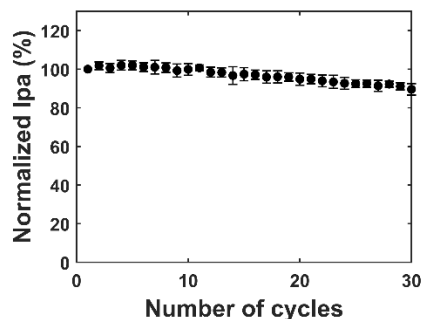

**Fig. S3** Nafion-CNT/EC CFME repeatability in 1  $\mu\text{M}$  5-HT solution for 30 consecutive cycles. The  $I_{pa}$ s are normalized to the initial cycles. Potential range: -0.1 to 0.6 V. Scan rate: 200 mV/s. Error bars denote standard error ( $n=3$ ).

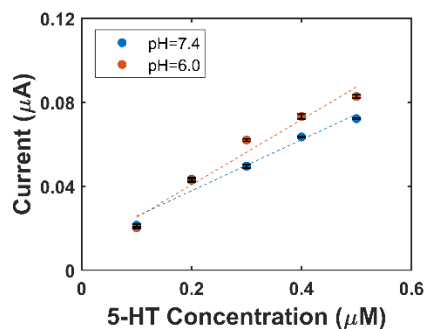

**Fig. S4** Calibration curves of Nafion-CNT/EC CFME for 5-HT detection in pH 7.4 and pH 6.0 solution. The sensitivity is 121.7 nA/ $\mu\text{M}$  and the LOD is 14.5 nM for pH = 7.4, while the sensitivity is 155.5 nA/ $\mu\text{M}$  and the LOD is 7.8 nM for pH = 6.0. Potential range: -0.1 to 0.6 V. Scan rate: 200 mV/s. Error bars denote standard error ( $n=3$ ).

**Table S1** Composition of artificial urine for platform testing. Artificial urine was made using DI water

| Chemical Component         | Concentration |
|----------------------------|---------------|
| Peptone                    | 1 g/L         |
| Yeast Extract              | 5 mg/L        |
| Lactic Acid                | 100 mg/L      |
| Citric Acid                | 400 mg/L      |
| Sodium Bicarbonate         | 2.1 g/L       |
| Urea                       | 10 g/L        |
| Uric Acid                  | 70 mg/L       |
| Creatinine Hydrochloride   | 900 mg/L      |
| Calcium Chloride Dihydrate | 370 mg/L      |
| Sodium Chloride            | 5.2 g/L       |
| Iron (II) Sulfate          | 1 mg/L        |

|                               |          |
|-------------------------------|----------|
| Magnesium Sulfate Anhydrous   | 240 mg/L |
| Sodium Sulfate Decahydrate    | 3.2 g/L  |
| Potassium Phosphate Monobasic | 950 mg/L |
| Potassium Phosphate Dibasic   | 1.2 g/L  |
| Ammonium Chloride             | 1.3 g/L  |

**Table S2** Comparative table of electrochemical methods for 5-HT detection using benchtop or portable equipment

| Electrode Material | Target | Method  | Detection limit | Run Time | Portable | Refs      |
|--------------------|--------|---------|-----------------|----------|----------|-----------|
| Nafion CFME        | 5-HT   | FSCV    | 2.4 nM          | 0.1 s    | N        | [1]       |
| Nafion CFME        | 5-HT   | FSCAV   | 1.6 nM          | 10 s     | N        | [2]       |
| MWCNT-CS GCE       | 5-HT   | DPV     | 50 nM           | 1 s      | N        | [3]       |
| PEDOT:PSS/CS-G SPE | DA     | DPV     | 290 nM          | 20 s     | Y        | [4]       |
| Gr-AV              | 5-HT   | CV      | 390 nM          | 60 s     | Y        | [5]       |
| AuNPs/CNTs SPE     | 5-HT   | CV, DPV | 300 nM          | 70 s     | Y        | [6]       |
| CFME and CNF array | DA     | FSCV    | 500 nM          | 0.1 s    | Y        | [7]       |
| CFME               | DA     | FSCV    | 1 $\mu$ M       | 0.1 s    | Y        | [8]       |
| Nafion-CNT/EC CFME | 5-HT   | CV      | 140 nM          | 67 s     | Y        | This work |

Abbreviations: MWCNT: multi-walled nanotube, CS: chitosan, GCE: glassy carbon electrode, PEDOT: poly(3,4-ethylenedioxythiophene), PSS: poly (styrene sulfonate), G: graphene, SPE: screen-printed electrode, Gr: graphite powder, AV: automotive varnish, AuNPs: gold nanoparticles, CNF: carbon nanofiber.

## Reference

- 1 K. E. Dunham and B. J. Venton, *Analyst*, 2020, **145**, 7437–7446.
- 2 A. Abdalla, C. W. Atcherley, P. Pathirathna, S. Samaranayake, B. Qiang, E. Peña, S. L. Morgan, M. L. Heien and P. Hashemi, *Anal. Chem.*, 2017, **89**, 9703–9711.
- 3 M. Satyanarayana, K. Koteswara Reddy and K. Vengatajalabathy Gobi, *Electroanalysis*, 2014, **26**, 2365–2372.
- 4 X. Shen, F. Ju, G. Li and L. Ma, *Sensors*, 2020, **20**, 2781.
- 5 L. O. Orzari, R. Cristina de Freitas, I. Aparecida de Araujo Andreotti, A. Gatti and B. C. Janegitz, *Biosens. Bioelectron.*, 2019, **138**, 111310.
- 6 Y. Li, Z. Li, H. Liu, S. Chen, X. Guo, M. Lin and F. Li, *J. Electrochem. Soc.*, 2019, **166**, B524–B531.
- 7 J. E. Koehne, M. Marsh, A. Boakye, B. Douglas, I. Y. Kim, S. Y. Chang, D. P. Jang, K. E. Bennet, C. Kimble, R. Andrews, M. Meyyappan and K. H. Lee, *Analyst*, 2011, **136**, 1802–1805.
- 8 S. D. Adams, E. H. Doeven, S. J. Tye, K. E. Bennet, M. Berk and A. Z. Kouzani, *IEEE Trans. Neural Syst. Rehabil. Eng.*, 2020, **28**, 133–142.
